# Supplementary material for: Morphology-controllable graphene–TiO2 nanorod hybrid nanostructures for polymer composites with high dielectric performance
Source: Royal Society of Chemistry journal article supplement (doi:10.1039/c1jm12903a), 2011-01-01
Supplement: c1jm12903a.pdf [file c1jm12903a.pdf]

# Supporting Information

## Morphology-controllable graphene-TiO<sub>2</sub>nanorodhybrid nanostructuresforpolymer composites with high dielectric performance

Chao Wu, Xingyi Huang\* LiyuanXie, Xingfeng Wu, Jinghong Yu andPingkai Jiang\*

Department of Polymer Science and Engineering, Shanghai Key Lab of Electrical Insulation and  
Thermal Aging, Shanghai Jiao Tong University,Shanghai 200240, China.

E-mail address: xyhuang@sjtu.edu.cn, pkjiang@sjtu.edu.cn

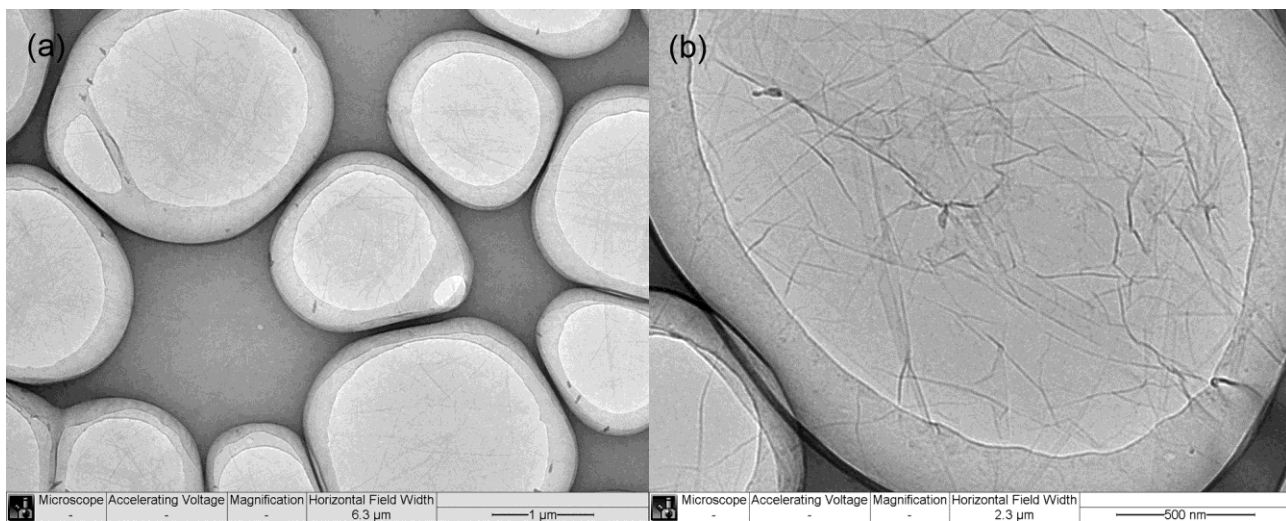

**Figure S1.** Representative TEM image of the GO

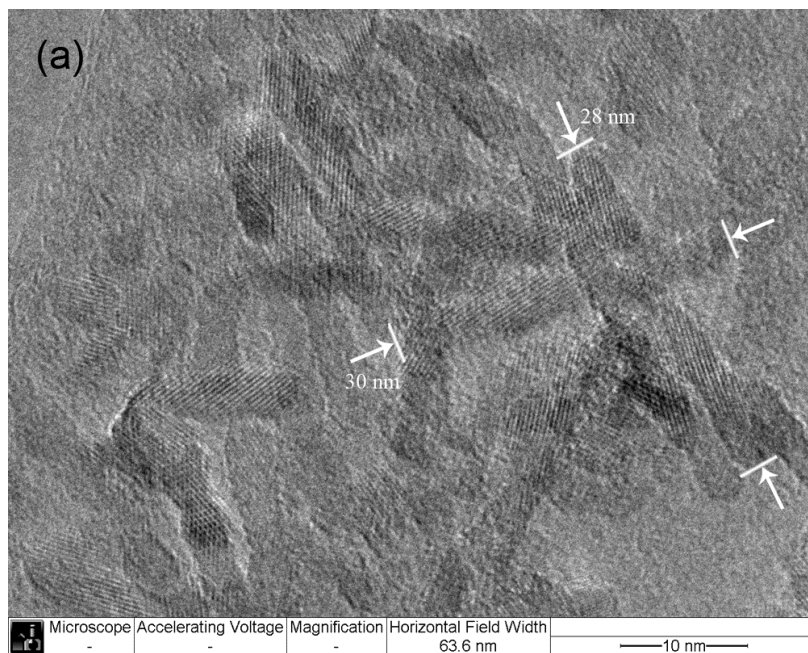

**Figure S2.** High resolution TEM of GT-hybrid sheets

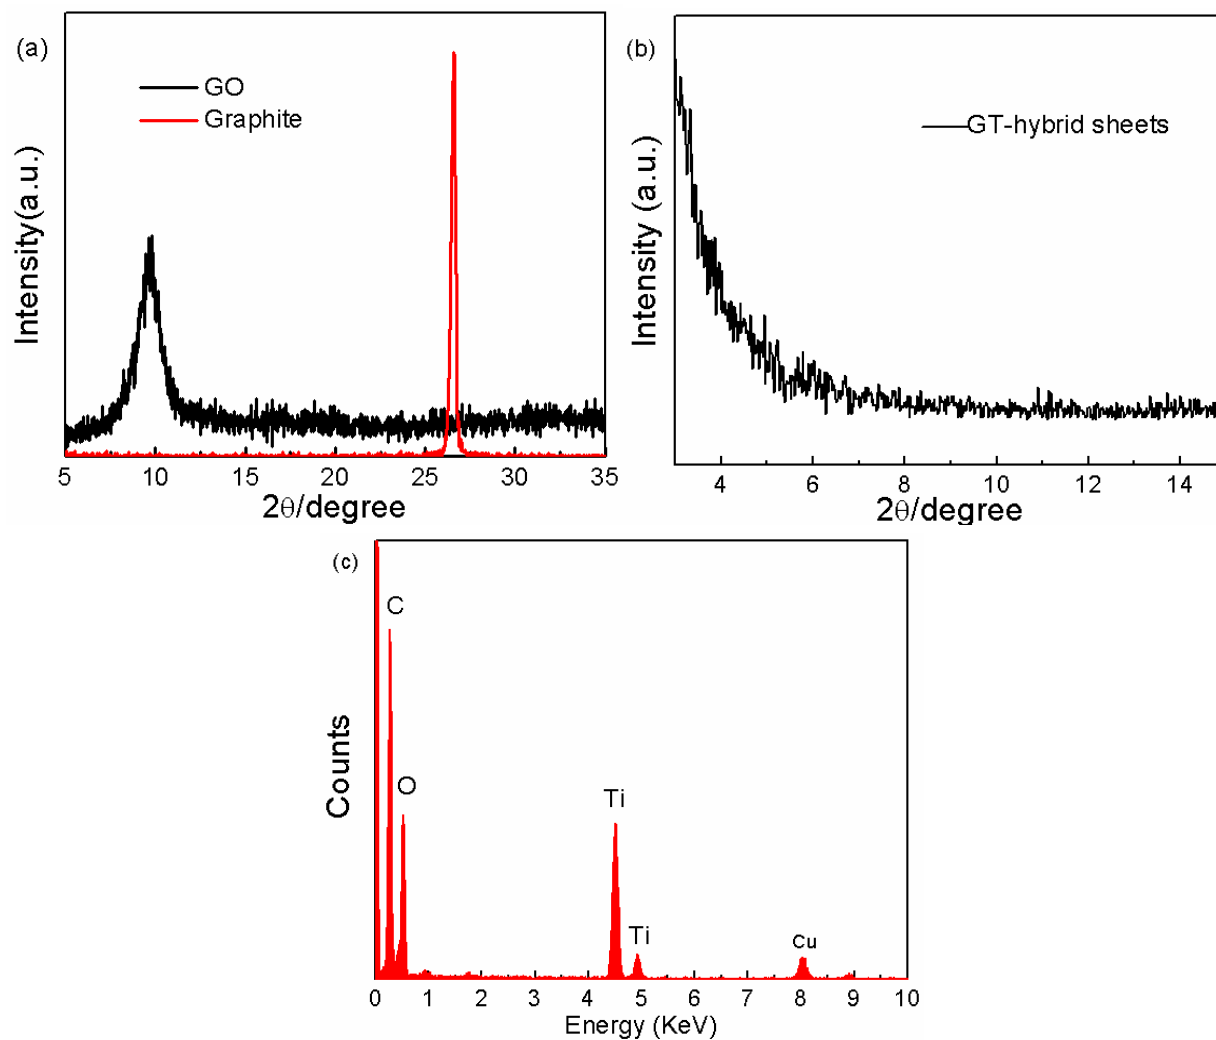

**Figure S3.** a) XRD patterns of GO and Graphite, b) XRD pattern, and c) EDX spectrum of GT-hybrid sheets.

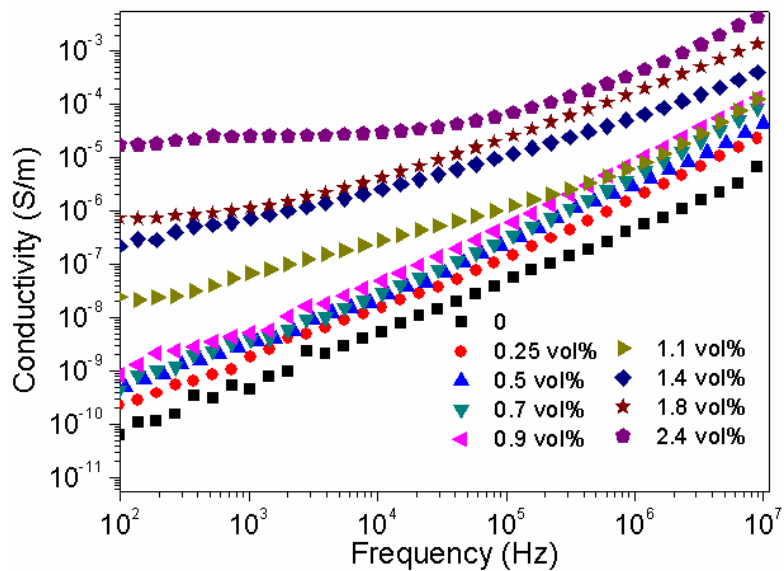

**Figure S4.** Frequency dependence of ac conductivity of the GS/PS composites.

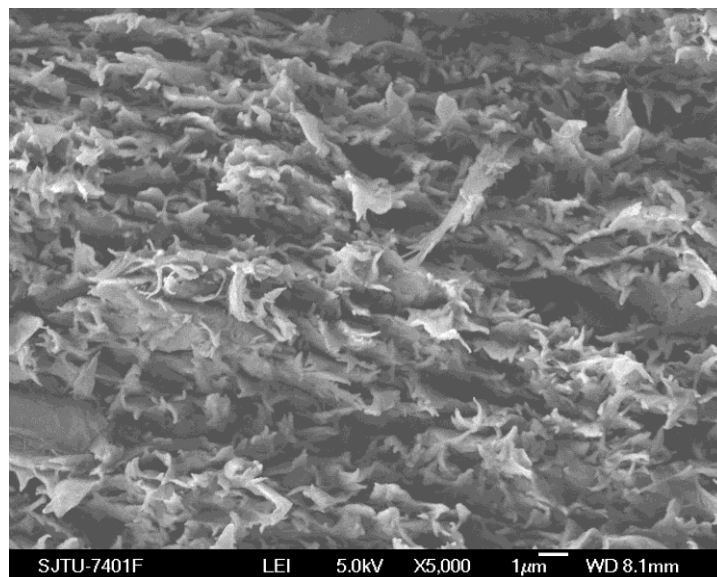

**Figure S5.** A typical SEM image of fractured surface of the PS composite with 10.9 vol% GT-hybrid sheet.

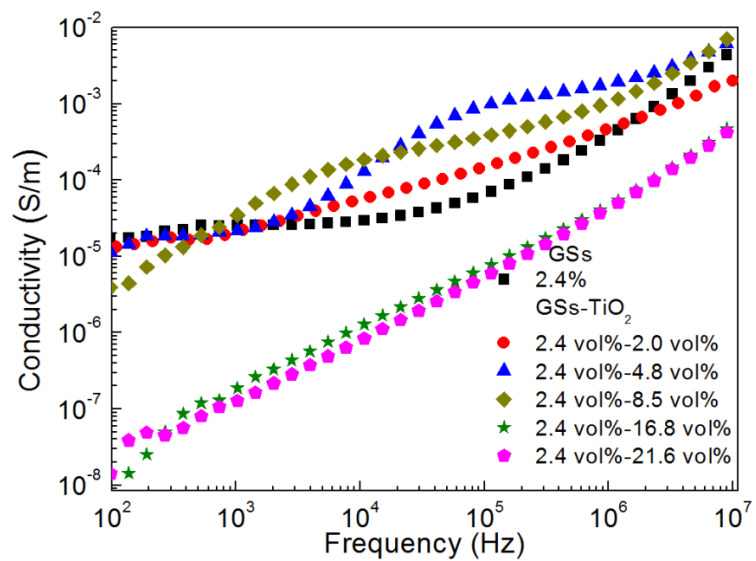

**Figure S6.** Frequency dependence of ac conductivity of the GT-hybrid sheet/PS composites.
